# Supplementary material
Source: HighWire-hosted journal article supplement (http://www.ajnr.org/highwire/filestream/52020/field_highwire_adjunct_files/0/1273__tables.pdf)
Supplement: 1273__tables.pdf [file 1273__tables.pdf]

**On-Line Table 1: MR imaging findings of 21 patients with dural tears caused by spinal burst fractures**

| No. | Sex | Age | Fracture Site | Lamina Fracture* | IP Distance (mm) | Ratio of Diameter† | Angle‡ (°) | EDH Extent§ | Size of Dural Tear (mm) |
|-----|-----|-----|---------------|------------------|------------------|--------------------|------------|-------------|-------------------------|
| 1   | M   | 49  | L2            | 1                | 26               | 0.45               | 72         | 6           | 25                      |
| 2   | M   | 24  | L2            | 2                | 26               | 0.13               | 111        | 2           | 23                      |
| 3   | F   | 23  | L2            | 2                | 26               | 0.18               | 103        | 4           | 35                      |
| 4   | M   | 31  | L4            | 2                | 30               | 0.34               | 126        | 2           | 15                      |
| 5   | F   | 31  | L1, L4        | 0, 2             | 24, 24           | 0.43, 0.46         | 134, 129   | 0, 0        | 5, 10                   |
| 6   | F   | 31  | L2            | 2                | 29               | 0.24               | 106        | 2           | 18                      |
| 7   | F   | 41  | L3            | 3                | 31               | 0.24               | 79         | 4           | 20                      |
| 8   | M   | 22  | L3            | 2                | 31               | 0.20               | 135        | 4           | 17                      |
| 9   | F   | 64  | L1            | 1                | 29               | 0.35               | 124        | 3           | 24                      |
| 10  | M   | 68  | L4            | 1                | 28               | 0.50               | 97         | 2           | 13                      |
| 11  | M   | 46  | L1            | 3                | 30               | 0.65               | 133        | 0           | 27                      |
| 12  | M   | 31  | L1            | 1                | 26               | 0.52               | 127        | 2           | 8                       |
| 13  | M   | 76  | L1            | 0                | 24               | 0.42               | 112        | 0           | 10                      |
| 14  | F   | 48  | L1            | 3                | 25               | 0.41               | 81         | 1           | 20                      |
| 15  | M   | 22  | L5            | 3                | 34               | 0.45               | 180        | 2           | 22                      |
| 16  | M   | 24  | L1            | 0                | 33               | 0.58               | 69         | 1           | 15                      |
| 17  | M   | 54  | T12           | 3                | 29               | 0.32               | 66         | 4           | 28                      |
| 18  | M   | 64  | T12           | 3                | 27               | 0.59               | 180        | 4           | 35                      |
| 19  | F   | 74  | L1            | 0                | 25               | 0.35               | 64         | 0           | 9                       |
| 20  | M   | 27  | L4            | 2                | 39               | 0.20               | 113        | 6           | 37                      |
| 21  | F   | 27  | L3            | 3                | 36               | 0.15               | 118        | 2           | 40                      |

**Note:**—IP indicates interpedicular; EDH, epidural hemorrhage.

\* Degree of fracture: 0, no fracture; 1, fracture without gap; 2, fracture with gap; 3, displaced fracture.

† Ratio of the central canal diameter taken by measuring the cross-sectional diameter of the normal central canal as drawn by an imaginary line and the narrowest portion at the burst fracture level, as seen on axial images.

‡ Angle of the retropulsed vertebral body.

§ Number of vertebral bodies within the extent of epidural hemorrhage.

**On-Line Table 2: MR imaging findings of 33 patients without dural tears in spinal burst fractures**

| No. | Sex | Age | Fracture Site | Lamina Fracture* | IP Distance (mm) | Ratio of Diameter† | Angle‡ (°) | EDH Extents§ |
|-----|-----|-----|---------------|------------------|------------------|--------------------|------------|--------------|
| 1   | M   | 64  | T12           | 0                | 22               | 0.85               | 142        | 0            |
| 2   | M   | 41  | L1            | 0                | 18               | 0.46               | 138        | 4            |
| 3   | F   | 33  | T12           | 0                | 25               | 0.52               | 132        | 0            |
| 4   | M   | 64  | L2            | 2                | 27               | 0.71               | 131        | 0            |
| 5   | M   | 42  | L1            | 3                | 24               | 0.36               | 66         | 2            |
| 6   | F   | 68  | L2            | 0                | 25               | 0.75               | 120        | 0            |
| 7   | F   | 34  | L1            | 1                | 26               | 0.49               | 113        | 5            |
| 8   | M   | 44  | T12           | 3                | 25               | 0.60               | 109        | 4            |
| 9   | M   | 41  | L3            | 1                | 26               | 0.39               | 118        | 4            |
| 10  | M   | 44  | L2            | 3                | 32               | 0.21               | 81         | 0            |
| 11  | M   | 44  | L1            | 2                | 25               | 0.63               | 133        | 0            |
| 12  | M   | 51  | T12           | 2                | 27               | 0.42               | 109        | 4            |
| 13  | M   | 55  | L3            | 1                | 31               | 0.50               | 153        | 0            |
| 14  | M   | 46  | L3            | 2                | 28               | 0.40               | 134        | 3            |
| 15  | F   | 23  | T12           | 2                | 23               | 0.52               | 149        | 0            |
| 16  | M   | 38  | L1            | 0                | 24               | 0.73               | 126        | 1            |
| 17  | M   | 37  | L3, L4        | 2, 2             | 29, 30           | 0.80, 0.52         | 180, 180   | 1, 1         |
| 18  | M   | 29  | L4            | 2                | 23               | 0.43               | 180        | 0            |
| 19  | M   | 23  | L4            | 1                | 26               | 0.62               | 180        | 2            |
| 20  | F   | 62  | T12           | 1                | 23               | 0.75               | 144        | 0            |
| 21  | F   | 23  | L2            | 0                | 26               | 0.73               | 147        | 2            |
| 22  | F   | 61  | L2            | 0                | 26               | 0.58               | 129        | 0            |
| 23  | F   | 69  | L3            | 0                | 28               | 0.67               | 141        | 0            |
| 24  | M   | 85  | L1            | 1                | 26               | 0.76               | 139        | 0            |
| 25  | F   | 63  | L3            | 0                | 26               | 0.48               | 109        | 3            |
| 26  | M   | 77  | T12           | 0                | 25               | 0.63               | 95         | 0            |
| 27  | M   | 56  | L2            | 2                | 29               | 0.45               | 123        | 3            |
| 28  | F   | 72  | T12           | 1                | 20               | 0.62               | 112        | 0            |
| 29  | M   | 17  | L5            | 1                | 34               | 0.86               | 125        | 3            |
| 30  | F   | 76  | L1            | 1                | 25               | 0.57               | 103        | 0            |
| 31  | F   | 43  | T12, L1       | 2, 1             | 27, 29           | 0.54, 0.53         | 105, 104   | 2, 2         |
| 32  | M   | 56  | L1            | 0                | 23               | 0.70               | 180        | 0            |
| 33  | F   | 28  | L1            | 2                | 25               | 0.53               | 55         | 3            |

\* Degree of fracture: 0, no fracture; 1, fracture without gap; 2, fracture with gap; 3, displaced fracture.

† Ratio of the central canal diameter taken by measuring the cross-sectional diameter of the normal central canal as drawn by an imaginary line and the narrowest portion at the burst fracture level, as seen on axial images.

‡ Angle of the retropulsed vertebral body.

§ Number of vertebral bodies within the extent of epidural hemorrhage.
